# Supplementary material for: Impact of Urinary Tract Infections on In-Hospital Outcomes in Acute Myocardial Infarction: Insights from the National Inpatient Sample (2016-2021)
Source: Research Square preprint supplement (doi:10.21203/rs.3.rs-6535029/v1), 2025-05-30
Supplement: Supplementary file 1 [file 3581f79d7b948d191fb3ffeb.docx]

**Supplementary Table 1: ICD-10-CM Codes for Comorbidities, Risk Factors, AMI Subtypes, UTI, and In-Hospital Outcomes:**

| Category | Condition | ICD-10-CM Codes |
| --- | --- | --- |
| Comorbidities & Risk Factors | Smoking | F17X, Z72.0, Z87891 |
|  | Dyslipidaemia | E78X |
|  | Family history of coronary artery disease | Z82.49 |
|  | Prior myocardial infarction (MI) | I252, I22xx |
|  | Prior percutaneous coronary intervention (PCI) | Z9861, Z955 |
|  | Prior coronary artery bypass grafting (CABG) | Z95.1, I257xx, I25810, I25812 |
|  | Obesity | E66x |
|  | Diabetes mellitus (uncomplicated) | E100, E101, E109, E110, E111, E119, E120, E121, E129, E130, E131, E139, E140, E141, E149 |
|  | Diabetes mellitus (complicated) | E102-E108, E112-E118, E122-E128, E132-E138, E142-E148 |
|  | Hypertension (uncomplicated) | I10 |
|  | Hypertension (complicated) | I11, I12, I13, I15 |
|  | Chronic renal failure | I120, I131, N250, Z490, Z491, Z492, Z940, Z992, N18, N19 |
| AMI Subtypes & Urinary Tract Infection (UTI) | Acute myocardial infarction (AMI) | I21, I22 |
|  | ST-segment elevation myocardial infarction (STEMI) | I21.0, I21.1, I21.2, I21.3 |
|  | Non-ST-segment elevation myocardial infarction (NSTEMI) | I21.4 |
|  | Urinary tract infection (UTI) | N39.0 |
| In-Hospital Outcomes | In-hospital mortality | Derived from discharge status (no specific ICD-10 code) |
|  | Cardiogenic shock | R57.0 |
|  | Acute kidney injury (AKI) | N170, N171, N172, N178, N179 |
|  | Stroke | I63, I64 |
|  | Cardiac arrest | I46X |
|  | GI Bleeding | I85.0, K25.0 - K25.4, K26.0 - K26.4, K27.0 - K27.4, K29.0 - K29.9, K57.0 - K57.9, I84.0 - I84.9 |
