# Supplementary material for: Impact of Urinary Tract Infections on In-Hospital Outcomes in Acute Myocardial Infarction: Insights from the National Inpatient Sample (2016-2021)
Source: Research Square preprint supplement (doi:10.21203/rs.3.rs-6535029/v1), 2025-05-30
Supplement: Supplementary file 2 [file ec893f1620d4267695b19613.docx]

|  | Unmatched | | | Matched | | |
| --- | --- | --- | --- | --- | --- | --- |
| Variables | **No UTI (n = 726,546)** | **UTI (n = 33,631)** | **P-value** | **No UTI (n = 8705)** | **UTI (n = 8705)** | **P-value** |
| Age, years (mean ± SD) | 66.6 ± 13.3 | 74.8 ± 12.1 | <0.001 | 79.00 ± 10.09 | 79.00 ± 10.09 | 1.0000 |
| Sex, n (%) |  |  | <0.001 |  |  |  |
| Male | 465,435 (64.1%) | 11,129 (33.1%) |  | 2705 (31.1%) | 2705 (31.1%) | 1.0000 |
| Female | 261,013 (35.9%) | 22,497 (66.9%) |  | 6000 (68.9%) | 6000 (68.9%) | 1.0000 |
| Race, n (%) |  |  | <0.001 |  |  |  |
| White | 526,287 (75.0%) | 24,252 (74.4%) |  | 7751 (89%) | 7751 (89%) |  |
| Black | 77,755 (11.1%) | 3,578 (11.0%) |  | 470 (5.4%) | 470 (5.4%) |  |
| Hispanic | 57,258 (8.2%) | 2,965 (9.1%) |  | 396 (4.5%) | 396 (4.5%) |  |
| Asian | 16,261 (2.3%) | 699 (2.1%) |  | 35 (0.4%) | 35 (0.4%) |  |
| Native American | 3,946 (0.6%) | 175 (0.5%) |  | 52 (0.6%) | 52 (0.6%) |  |
| Other | 20,016 (2.9%) | 909 (2.8%) |  | 14 (0.2%) | 14 (0.2%) |  |
| Smoking, n (%) | 361,078 (49.7%) | 11,262 (33.5%) | <0.001 | 2326 (26.7%) | 2326 (26.7%) | 1.0000 |
| Dyslipidemia n (%) | 466,227 (64.2%) | 19,178 (57.0%) | <0.001 | 5055 (58.1%) | 5055 (58.1%) | 1.0000 |
| Prior Myocardial Infarction, n (%) | 116,418 (16.0%) | 4,575 (13.6%) | <0.001 | 366 (4.2%) | 366 (4.2%) | 1.0000 |
| Prior PCI, n (%) | 121,570 (16.7%) | 4,474 (13.3%) | <0.001 | 336 (3.9%) | 336 (3.9%) | 1.0000 |
| Prior CABG, n (%) | 645,553 (88.9%) | 29,980 (89.1%) | 0.096 | 276 (3.2%) | 276 (3.2%) | 1.0000 |
| Diabetes Mellitus, n (%) | 228,606 (31.5%) | 10,805 (32.1%) | 0.010 | 1665 (19.1%) | 1665 (19.1%) | 1.0000 |
| Hypertension, n (%) | 312,515 (43.0%) | 9,887 (29.4%) | <0.001 | 2827 (32.5%) | 2827 (32.5%) | 1.0000 |
| Obesity, n (%) | 149,907 (20.6%) | 6,071 (18.1%) | <0.001 | 628 (7.2%) | 628 (7.2%) | 1.0000 |
| Chronic Renal Failure, n (%) | 147,448 (20.3%) | 11,108 (33.0%) | <0.001 | 2458 (28.2%) | 2458 (28.2%) | 1.0000 |
| Type of AMI |  |  |  |  |  |  |
| STEMI | 218949(30.1%) | 7206(21.4%) |  | 737(11.1%) | 737(11.1%) | 1.0000 |
| NTEMI | 507597(69.9%) | 26425(78.6%) |  | 58.78(89.9%) | 58.78(89.9%) | 1.0000 |
| Hospital Division (HCUP), n (%) |  |  | <0.001 |  |  | 1.0000 |
| New England | 77,633 (10.7%) | 2,988 (8.9%) |  | 436 (5%) | 436 (5%) |  |
| Middle Atlantic | 90,341 (12.4%) | 4,022 (12.0%) |  | 1320 (15.2%) | 1320 (15.2%) |  |
| East North Central | 113,420 (15.6%) | 5,183 (15.4%) |  | 1591 (18.3%) | 1591 (18.3%) |  |
| West North Central | 48,322 (6.7%) | 1,868 (5.6%) |  | 372 (4.3%) | 372 (4.3%) |  |
| South Atlantic | 155,316 (21.4%) | 7,636 (22.7%) |  | 2348 (27%) | 2348 (27%) |  |
| East South Central | 57,363 (7.9%) | 2,665 (7.9%) |  | 698 (8%) | 698 (8%) |  |
| West South Central | 83,979 (11.6%) | 4,635 (13.8%) |  | 1217 (14%) | 1217 (14%) |  |
| Mountain | 43,839 (6.0%) | 1,786 (5.3%) |  | 271 (3.1%) | 271 (3.1%) |  |
| Pacific | 56,333 (7.8%) | 2,848 (8.5%) |  | 452 (5.2%) | 452 (5.2%) |  |
| Primary Payer, n (%) |  |  | <0.001 |  |  | 1.0000 |
| Medicare | 406,140 (56.0%) | 26,254 (78.1%) |  | 7984 (91.7%) | 7984 (91.7%) |  |
| Medicaid | 68,145 (9.4%) | 2,141 (6.4%) |  | 138 (1.6%) | 138 (1.6%) |  |
| Private Insurance | 188,972 (26.0%) | 3,788 (11.3%) |  | 543 (6.2%) | 543 (6.2%) |  |
| Self-pay | 35,063 (4.8%) | 715 (2.1%) |  | 26 (0.3%) | 26 (0.3%) |  |
| No Charge | 3,071 (0.4%) | 67 (0.2%) |  | 14 (0.2%) | 14 (0.2%) |  |
| Other | 24,037 (3.3%) | 635 (1.9%) |  | 24 (0.3%) | 24 (0.3%) |  |
| Hospital Teaching Status, n (%) |  |  | <0.001 |  |  | 1.0000 |
| Rural | 56,025 (7.7%) | 3,264 (9.7%) |  | 749 (8.6%) | 749 (8.6%) |  |
| Urban non-teaching | 147,932 (20.4%) | 7,461 (22.2%) |  | 1455 (16.7%) | 1455 (16.7%) |  |
| Urban Teaching | 522,585 (71.9%) | 22,906 (68.1%) |  | 6501 (74.7%) | 6501 (74.7%) |  |
| Bed Size, n (%) |  |  | <0.001 |  |  | 1.0000 |
| Small | 141,565 (19.5%) | 6,656 (19.8%) |  | 1381 (15.9%) | 1381 (15.9%) |  |
| Medium | 214,550 (29.5%) | 10,291 (30.6%) |  | 2613 (30%) | 2613 (30%) |  |
| Large | 370,427 (51.0%) | 16,684 (49.6%) |  | 4711 (54.1%) | 4711 (54.1%) |  |
| Income Quartile, n (%) |  |  | <0.001 |  |  | 1.0000 |
| 0-25th percentile | 217,292 (30.4%) | 11,056 (33.3%) |  | 2882 (33.1%) | 2882 (33.1%) |  |
| 26th to 50th percentile (median) | 196,541 (27.5%) | 9,278 (28.0%) |  | 2397 (27.5%) | 2397 (27.5%) |  |
| 51st to 75th percentile | 168,582 (23.6%) | 7,171 (21.6%) |  | 1808 (20.8%) | 1808 (20.8%) |  |
| 76th to 100th percentile (Highest Income) | 131,208 (18.3%) | 5,592 (16.9%) |  | 1616 (18.6%) | 1616 (18.6%) |  |

Values are mean (±SD) and n (%).
**Abbreviations:** AMI = Acute Myocardial Infarction; UTI = Urinary Tract Infection; PCI = Percutaneous Coronary Intervention; CABG = Coronary Artery Bypass Grafting; STEMI = ST-Elevation Myocardial Infarction; NSTEMI = Non-ST-Elevation Myocardial Infarction; HCUP = Healthcare Cost and Utilization Project; SD= Standard deviation
